# Supplementary material
Source: Springer Nature journal article supplement (https://www.springermedizin.de/resource/supplementary/12943_2014_1359_MOESM1_ESM.pdf/9552776)

| Inhibition at 50nM (%) | Kinases Inhibited                                                                                                           |
|------------------------|-----------------------------------------------------------------------------------------------------------------------------|
| 99 - 100               | Chk1 (100% inhibition at this concentration)                                                                                |
| 90 - <99               | AAK1, RIOK1, RIOK3                                                                                                          |
| 65 - <90               | BIKE, FLT3, GRK4, LKB1, LOK, MEK5, MELK, PDGFRB, PIP5K1A, PIP5K2B, PKN1, PRKG2, PRKX, SLK, SNARK, SRPK1, SRPK3, STK16, YSK4 |

V158411 was screened against a panel of 386 wild-type kinases using the DiscoverX Kinome scanMAX technology

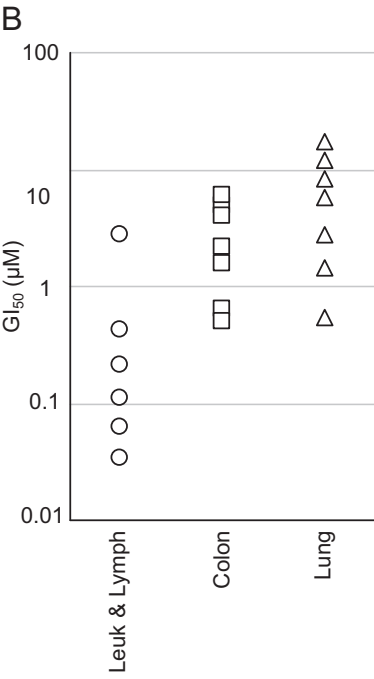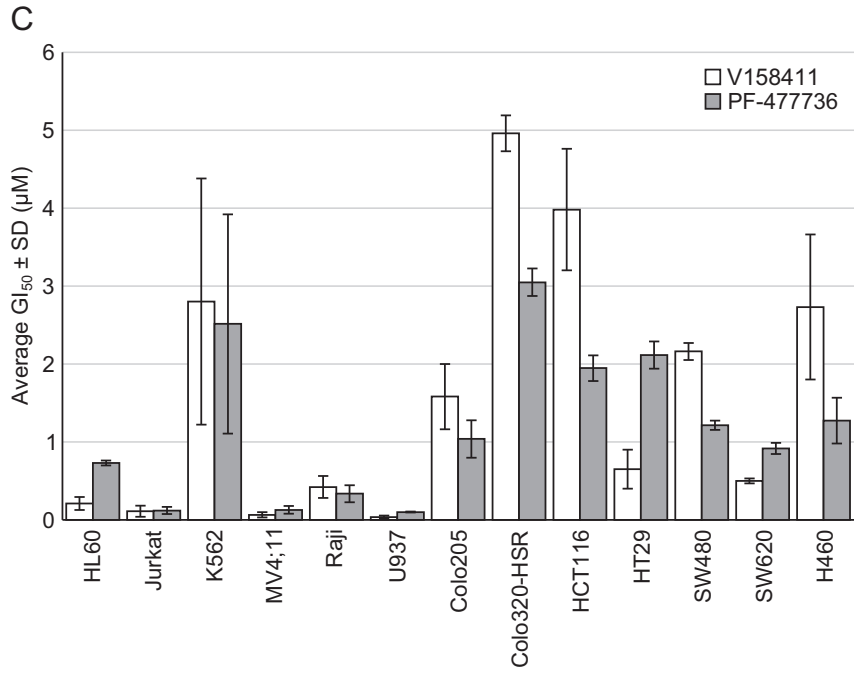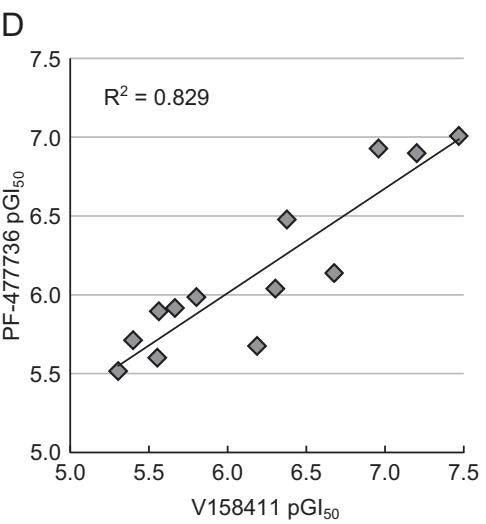

Supplement: MOESM1 [file 9552776]
